# Supplementary material
Source: PubMed Central journal article supplement (PMC2888964)

## Grewal et al., Supplemental Figure Legends

**Supplemental Figure S1.** RNAi mediated silencing of RAC1, CDC42, and RHOA expression in hESCs. **A, C, E)** hESCs were transfected with *RAC1*-directed siRNAs (RAC1-5 and RAC1-6), *RHOA*-directed siRNAs (RHOA-6 and RHOA-7), *CDC42*-directed siRNAs (CDC42-7 and CDC42-10), or with control non-silencing siRNA (NS). RAC1, RHOA, and CDC42 expression was evaluated 24 and 72 h post-transfection by Western blotting. Mock transfected and non-transfected cells were also analyzed and beta-actin (ACTB) was used as a loading control. **B, D, F)** hESCs were transfected as above and RAC1, RHOA and CDC42 expression was analyzed by immunohistochemistry 72 h post-transfection. Mouse or rabbit IgGs were used where appropriate and were shown to be negative.

**Supplemental Figure S2.** RNAi mediated silencing of PTK2 expression in hESCs. **A)** hESCs were transfected with *PTK2*-directed siRNAs (PTK2-1 and PTK2-2) or with control non-silencing siRNA (ns). PTK2 expression was evaluated 72 hrs post-transfection by immunohistochemistry. Cells were also counterstained with DAPI. **B)** Cells were transfected as above and vinculin localization was analyzed by immunohistochemistry. Cells were counterstained with Texas red phalloidin and DAPI, and a merged image of all three staining patterns is shown.

## Grewal et al., Supplemental Figure S1

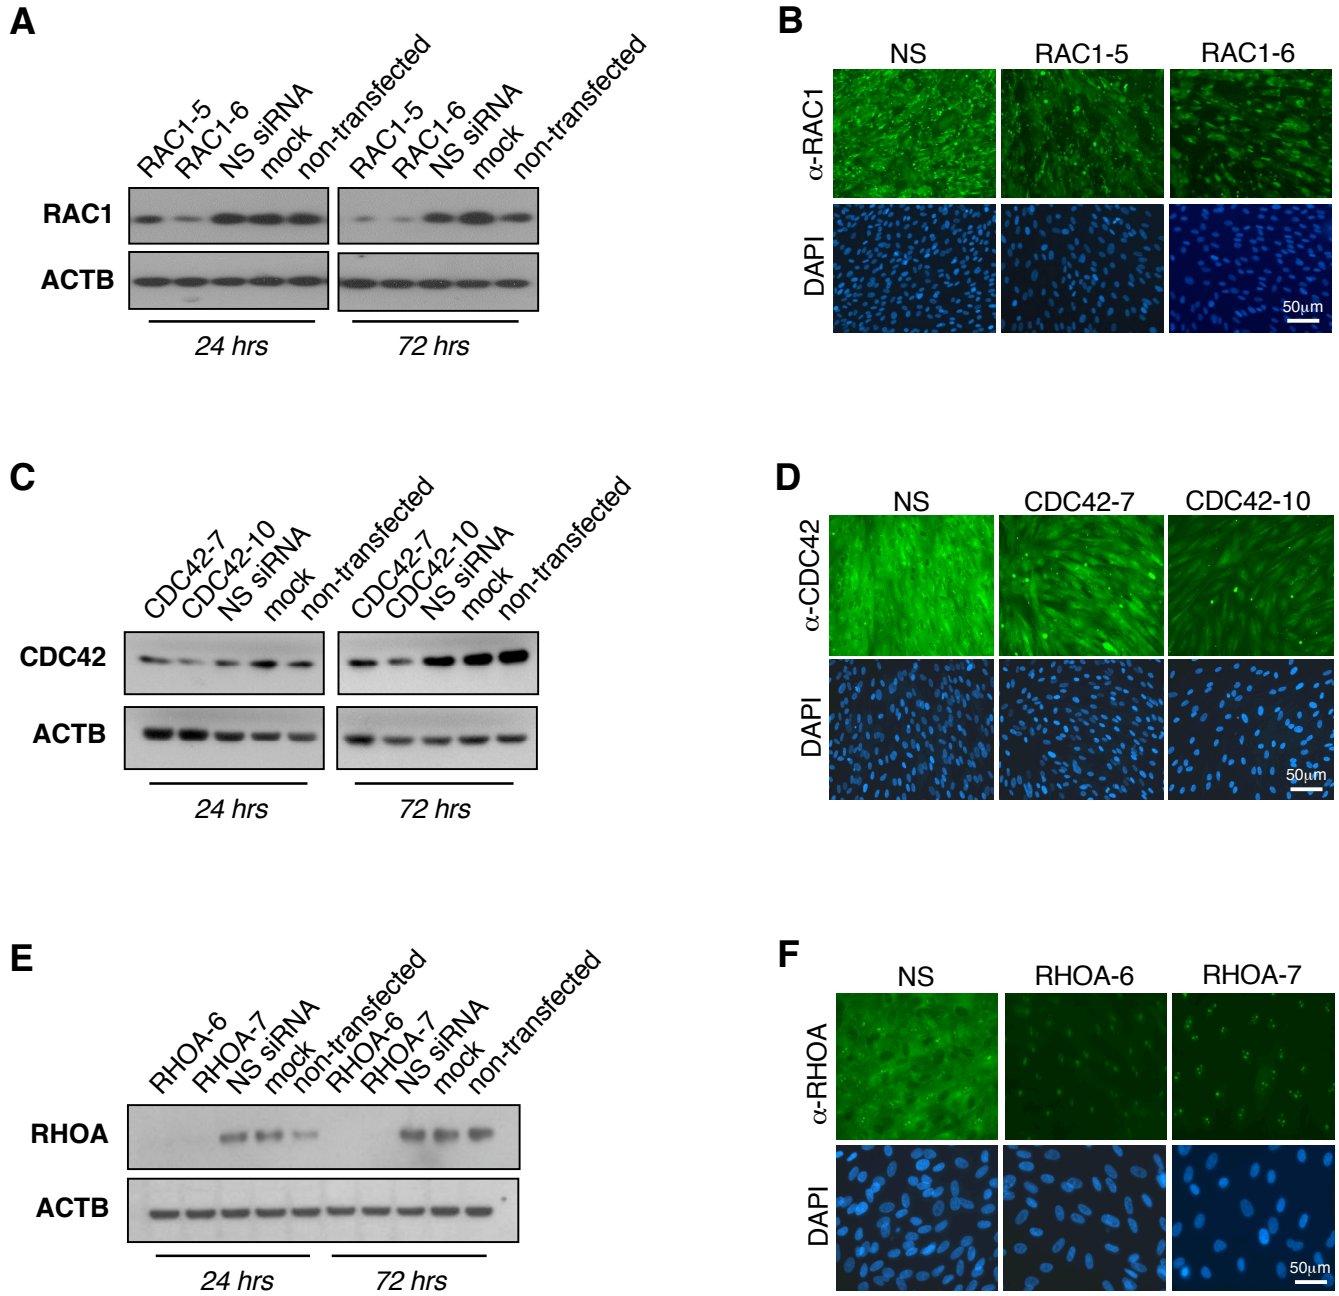

## Grewal et al., Supplemental Figure S2

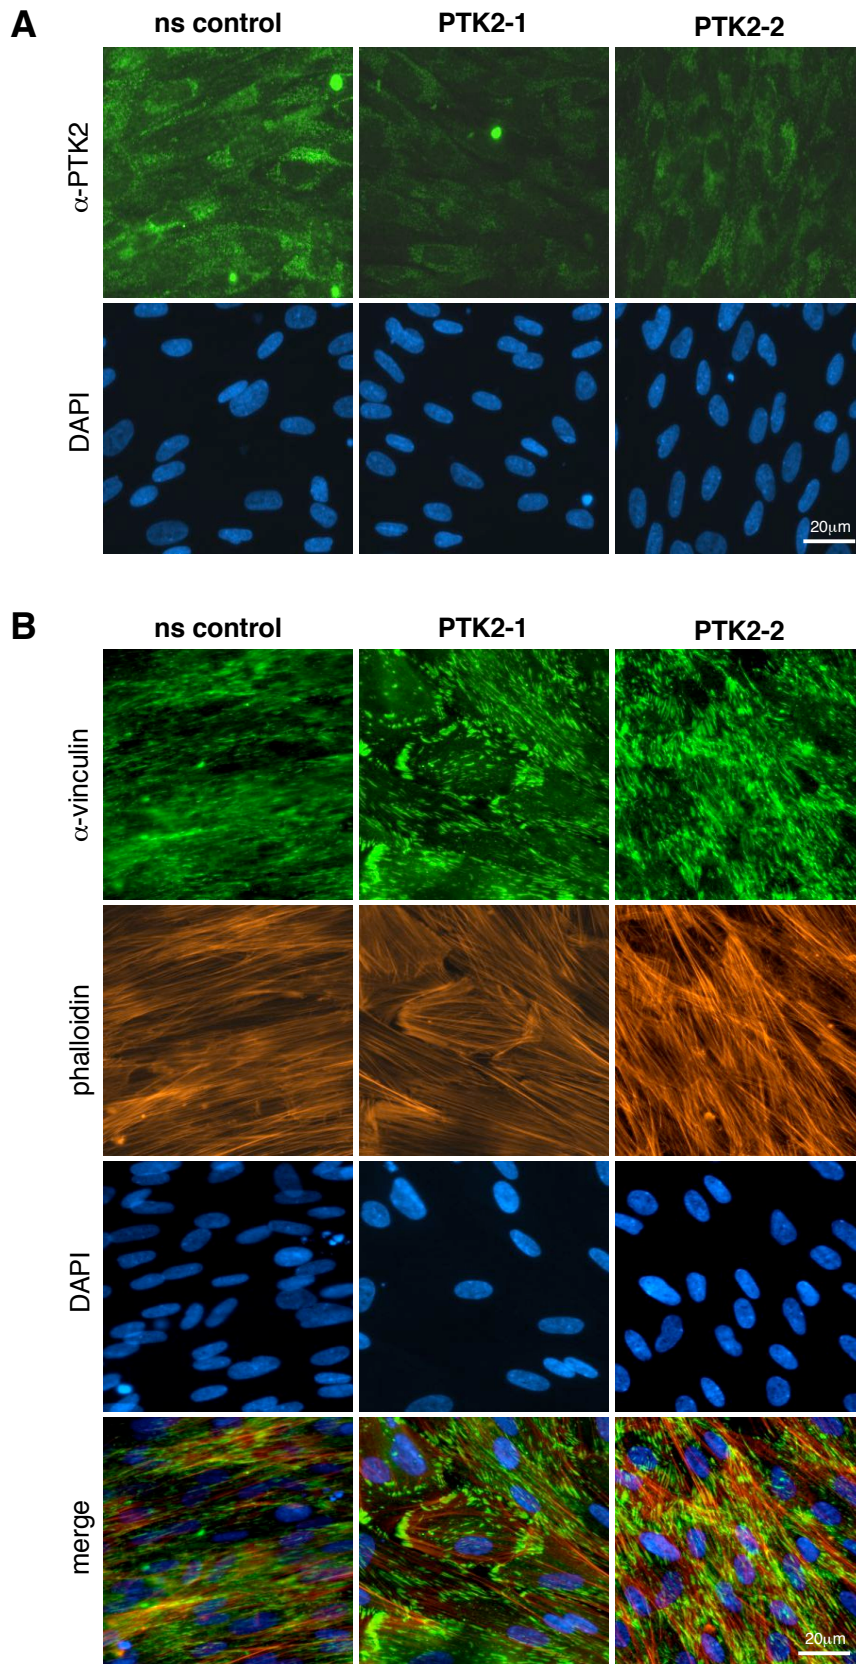

Supplement: supp_109.080630_biolreprod.109.080630-1.pdf [file supp_109.080630_biolreprod.109.080630-1.pdf]
